# Supplementary material for: S-Adenosylmethionine and Superoxide Dismutase 1 Synergistically Counteract Alzheimer’s Disease Features Progression in TgCRND8 Mice
Source: PubMed Central journal article supplement (PMC5745486; doi:10.3390/antiox6040076), 2017-09-30
Supplement: antioxidants-06-00076-s001.pdf [file antioxidants-06-00076-s001.pdf]

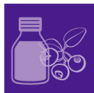

Table S1. Quali-quantitative composition of SOD microspheres.

| Components Description            | Weight (g)     | Function                         |
|-----------------------------------|----------------|----------------------------------|
| <b>Active Ingredient(s)</b>       |                |                                  |
| Freeze dried SOD powder           | 260.00         | Active Ingredient                |
| <b>Excipients</b>                 |                |                                  |
| Stearic acid p.f. 54–56 °C        | 100.00         | Diluent agent                    |
| Calcium chloride                  | 10.00          | Dissecant agent                  |
| <b>melted 15 min at 60 °C</b>     |                |                                  |
| Mannitol                          | 100.00         | Diluent                          |
| Microcrystalline cellulose pH 112 | 30.00          | Binder                           |
| <b>pre-compressed (I)</b>         |                |                                  |
| Stearic acid p.f. 54–56 °C        | 20.00          | Diluent agent                    |
| <b>pre-compressed (II)</b>        |                |                                  |
| <b>Weight</b>                     | <b>520.00</b>  |                                  |
| <b>Excipients (coating)</b>       |                |                                  |
| Arginine Shellac ( SSB 57 Luna )  | 400.00         | Coating agent (gastro-resistant) |
| Triethylcitrate                   | 30.00          | Platicizer                       |
| Talc                              | 70.00          | Lubrificant                      |
| Titanium dioxide                  | 20.00          | Opacizant                        |
| <b>Total weight</b>               | <b>1040.00</b> |                                  |
